# Supplementary material for: Human M1 macrophages express unique innate immune response genes after mycobacterial infection to defend against tuberculosis
Source: PubMed Central journal article supplement (PMC9119986; doi:10.1038/s42003-022-03387-9), 2022-05-19

**Human M1 macrophages express unique innate immune response genes after mycobacterial infection to defend against tuberculosis.**

Arshad Khan<sup>1\*</sup>, Kangling Zhang<sup>2\*</sup>, Vipul K. Singh<sup>1\*</sup>, Abhishek Mishra<sup>1</sup>, Priyanka Kachroo<sup>1</sup>, Tian Bing<sup>2</sup>, Jong Hak Won<sup>3</sup>, Arunmani Mani<sup>3</sup>, Ramesha Papanna<sup>3</sup>, Lovepreet K. Mann<sup>3</sup>, Eder Ledezma-Campos<sup>4</sup>, Genesis Aguillon-Duran<sup>4</sup>, David H. Canaday<sup>5</sup>, Sunil A. David<sup>6</sup>, Blanca I. Restrepo<sup>7</sup>, Nhung Nguyen Viet<sup>8</sup>, Ha Phan<sup>9</sup>, Edward A. Graviss<sup>1</sup>, James M. Musser<sup>1</sup>, Deepak Kaushal<sup>10</sup>, Marie Claire Gauduin<sup>10</sup>, and Chinnaswamy Jagannath<sup>1</sup>

<sup>1</sup>*Dept. of Pathology and Genomic Medicine, Houston Methodist Research Institute, Weill-Cornell Medicine, Houston, TX*

<sup>2</sup>*Dept. of Pharmacology and Toxicology, University of Texas Medical Branch, Galveston, TX*

<sup>3</sup>*Dept. of Obstetrics, Gynecology and Reproductive Sciences, UTHSC, Houston, TX, USA*

<sup>4</sup>*Centro Regional de TB, Secretaría de Salud de Tamaulipas, Reynosa, Mexico*

<sup>5</sup>*Division of Infectious Disease, Case Western Reserve University, Cleveland VA, OH, USA*

<sup>6</sup>*Virovax, LLC, Adjuvant Division, Lawrence, Kansas, USA.*

<sup>7</sup>*UT School of Public Health, Brownsville, and STDOI, UT Rio Grande Valley, TX. USA*

<sup>8</sup>*National Lung Hospital, Ha Noi, Vietnam*

<sup>9</sup>*Center for Promotion of Advancement of Society, Ha Noi, Vietnam*

<sup>10</sup>*Southwest National Primate Research Center, Texas Biomedical Research Institute, San Antonio, TX, USA.*

*\*Contributed equally to the manuscript.*

*Correspondence to:* Chinnaswamy Jagannath. Ph.D.

Professor, Dept. of Pathology and Genomic Medicine, Center for Molecular and Translational Human Infectious Diseases Research. Houston Methodist Research Institute, Weill-Cornell School of Medicine, Houston, TX 77030

Email: [cjagannath@houstonmethodist.org](mailto:cjagannath@houstonmethodist.org)

Phone: 713-459-7301 Fax: 713-441-7925

**Competing interests:** The authors declare no conflict of interest and certify that all studies were conducted under approved institutional Health Science Center and Institutional review board protocols.

**Keywords:** *human macrophages, Mycobacterium tuberculosis, BCG, M1-, M2-, macrophage phenotype, autophagy, IFN- $\gamma$ , IL-4, GBP, IRF, SIGLEC, SLAMF, ATG, RAB GTPASE, HDAC, Sirtuin, cathepsin, Rapamycin, antigen presentation, epigenetics, histone acetylation, transcriptomics, neonatal rhesus macaques*

**Supplemental Figure-1: Gating strategy for M1 and M2 macrophages before and after infection using *M. tuberculosis* (*Mtb*). Related to Figures 1a and 1b.**

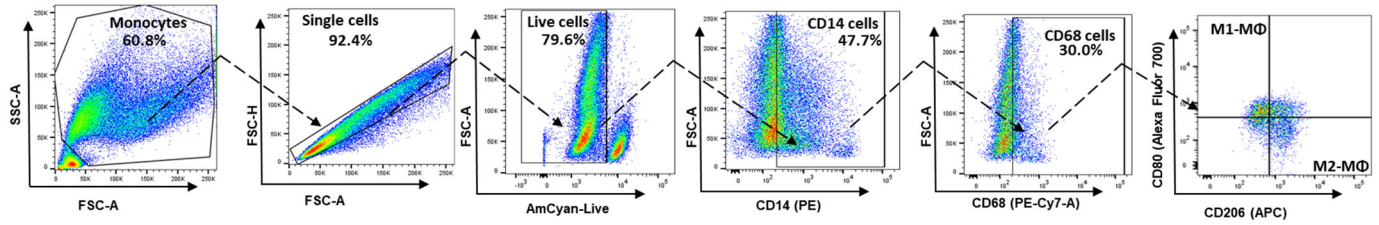

**M1-M $\phi$  gating:** Monocytes +ve , Single cells, live cells, CD14<sup>+</sup> cells, CD68<sup>+</sup> cells, CD80<sup>+</sup>CD206<sup>-</sup>

**M2-M $\phi$  gating :** Monocytes +ve , single cells, live cells, CD14<sup>+</sup> cells, CD68<sup>+</sup> cells, CD206<sup>+</sup>CD80<sup>-</sup>

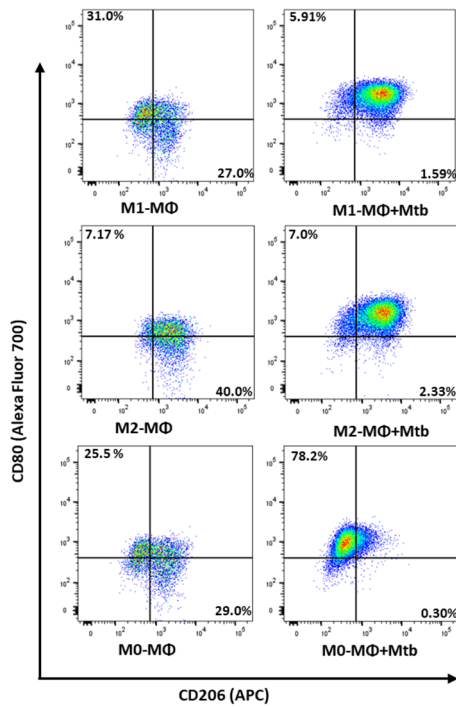

**Supplemental Figure-2: Mtb infected human M1, M2 and M0-MΦs show a differential cytokine and chemokine transcript responses and protein secretion profile.** **a** *Ex vivo* differentiated MΦs were infected with Mtb and culture supernatants collected at 18hr. post infection tested for pro and anti-inflammatory cytokines using sandwich ELISA. \* < 0.01, \*\*< 0.009, *t* test. **b** *Left panels*: RNAseq analysis of naïve or Mtb infected M1- and M2-MΦs shows a differential expression of CC and CXC chemokine genes. Fragments Per Kilobase of transcript per Million mapped reads (FPKM, mean± SD; n=2) and log2-fold differences are shown. *Right panels*: FPKM were analyzed for significance using Students two tailed test. \* < 0.05. **c** Elisa quantitated Chemokines differentially expressed by M1-, M2- and M0-MΦs are shown. \* < 0.01, \*\*< 0.009, *t* test. Note enhanced IL-1β correlated with enhanced gene expression for Caspases in Mtb infected M1- MΦs vs. M2-MΦs are shown (see SF-5).

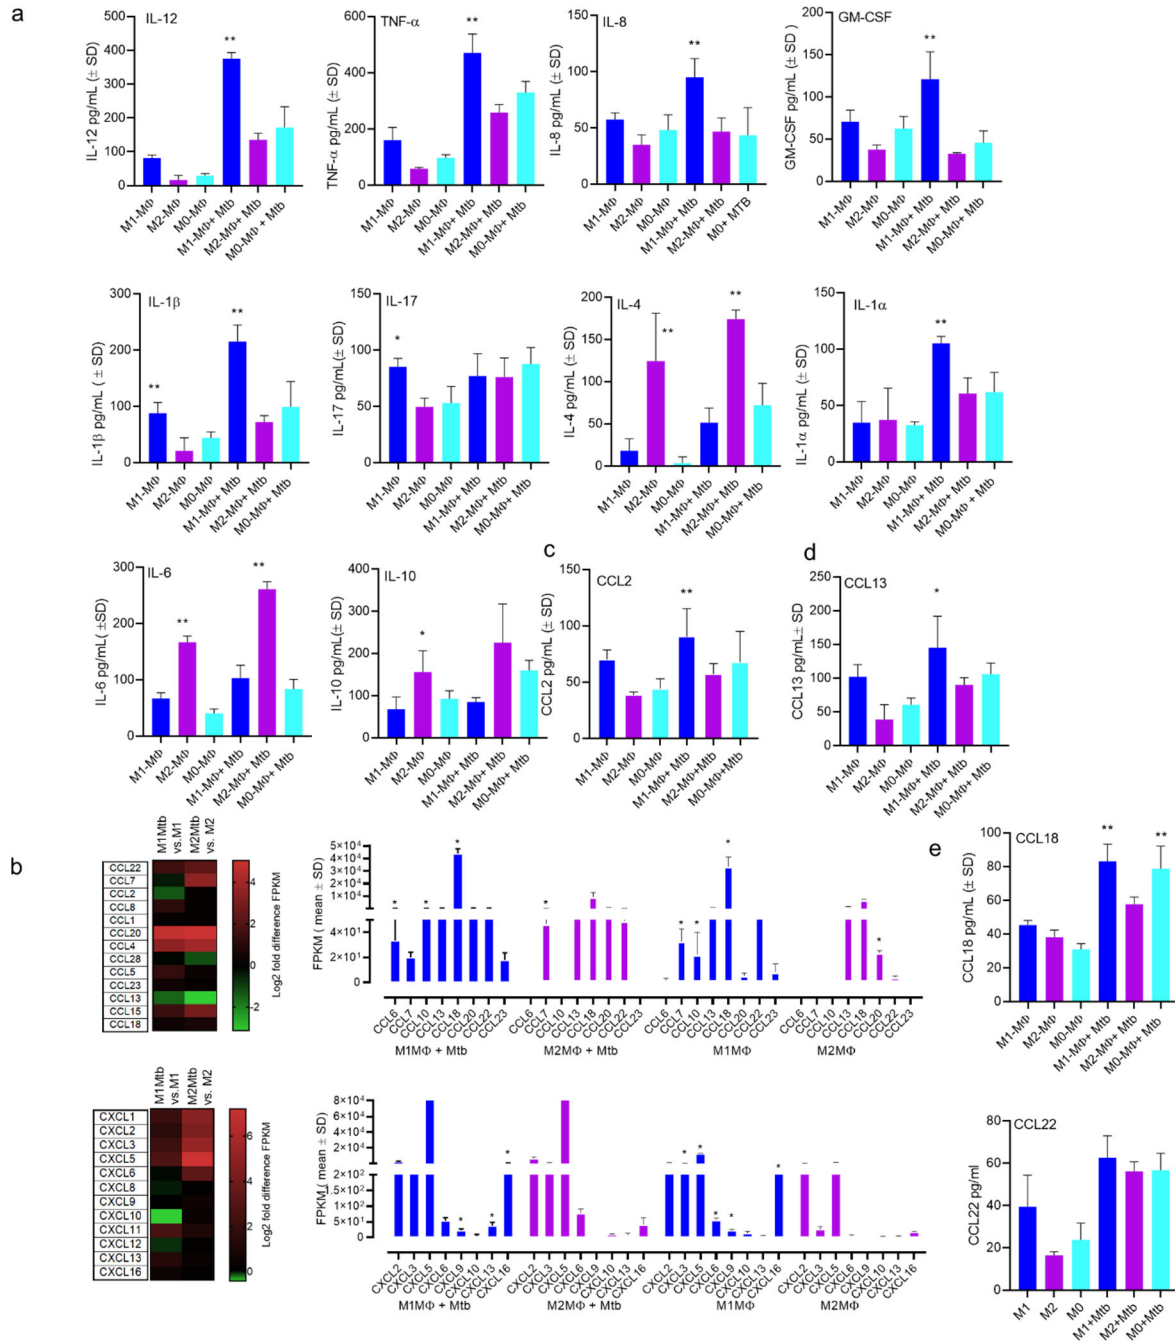

**Supplemental Figure-3a: Mtb infected human M1, M2 and M0-MΦs but not naïve MΦs show an upregulation of iNOS protein.** *Ex vivo* differentiated MΦs were infected with Mtb and lysates probed for iNOS using Wes-Proteinsimple blot system (Abclonal iNOS ab (A0312). Left: Blot profiles indicated; Middle: Densitometry is shown. Right: qPCR of mRNA for iNOS shown. \*  $p < 0.01$  t test.

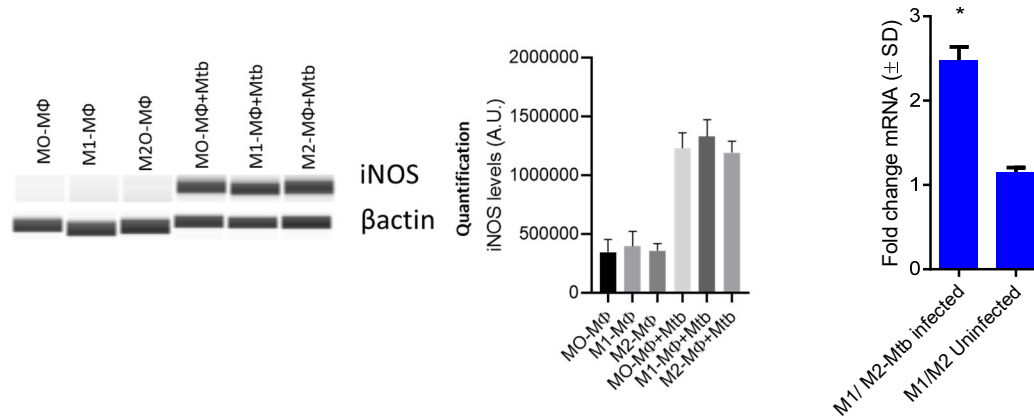

**Supplemental Figure-3b: Mtb infected human M1, M2 and M0-MΦs show a differential reactive oxygen species secretion.** *Ex vivo* differentiated MΦs were infected with Mtb and cells treated incubated in 1 mM dichloro-dihydro-fluorescein diacetate followed by reading RLU using a fluorometer at 18hr. post infection. \*\* $< 0.007$ , *t* test. Left: whole cell ROS using DCFDA; Right: Mitochondrial ROS detected using MitoRos (\* $p < 0.01$  using two tailed *t* test).

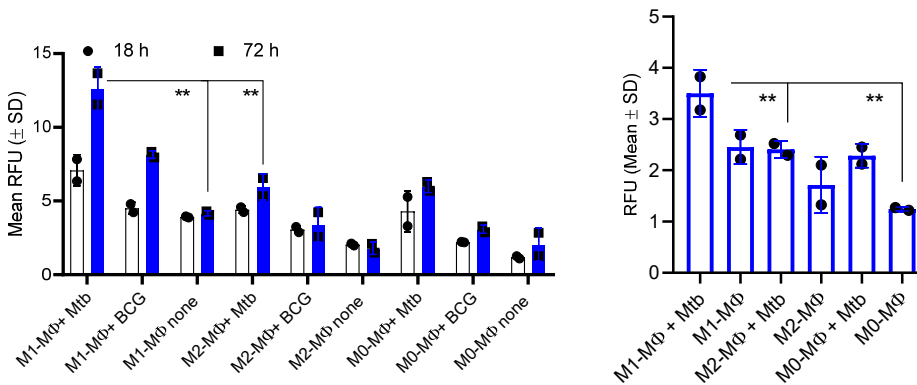



**Supplemental Figure-3c: Mtb infected human M1, M2 and M0-MΦs show a differential enrichment of LAMP1 on Mtb phagosomes.** Macrophages infected with gfpMtb (LAMP1) or rfpMtb (Rab7) were labeled using antibodies to LAMP1 and Rab7 followed by confocal imaging. Related to Fig.1m (LAMP1) and Fig.4b (Rab7). Quantitation of localization is shown in main Figures.

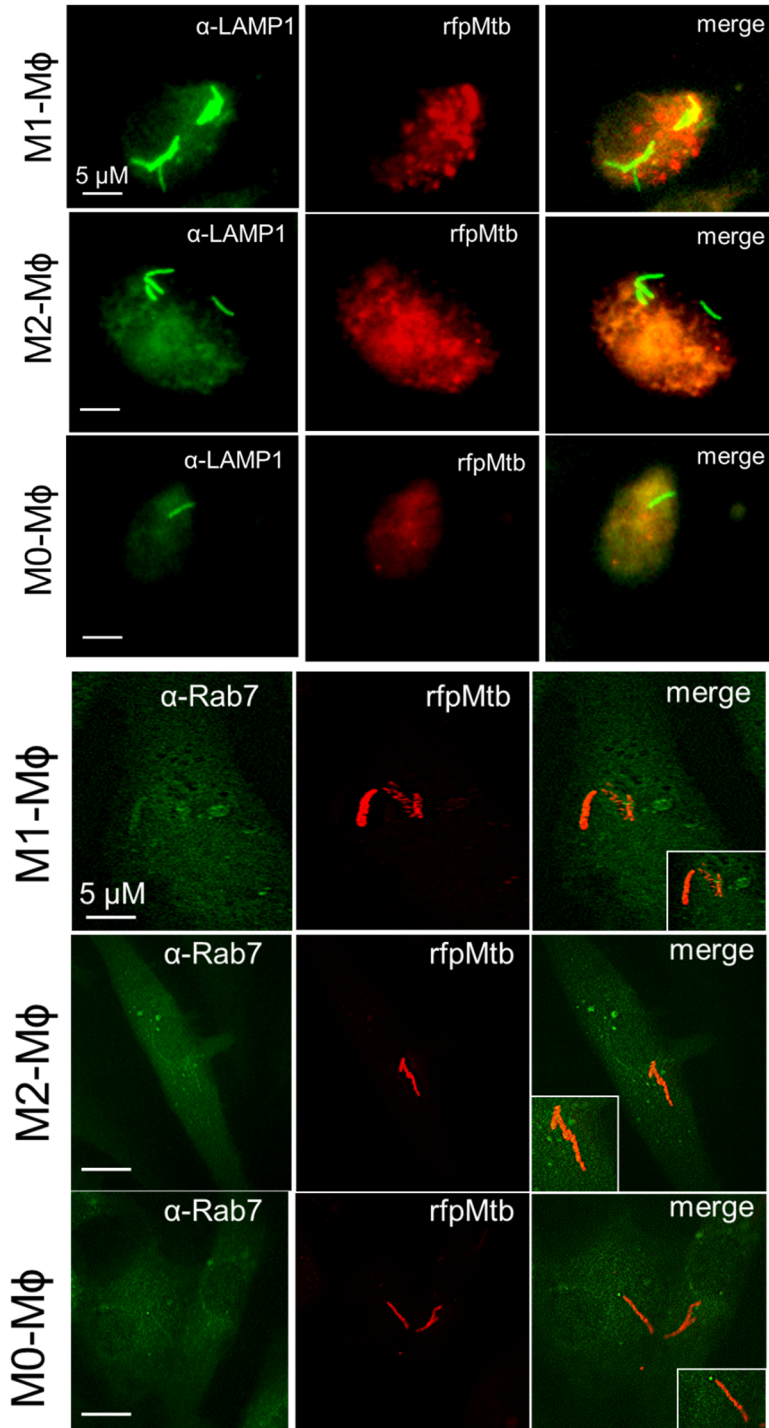

**Supplemental Figure-4:** Differential gene expression (DEG) analysis of Mtb infected M1-, M2- and M0-MΦs. Only selected genes of >top ~100 upregulated genes which showed > log2 change in expression are shown.

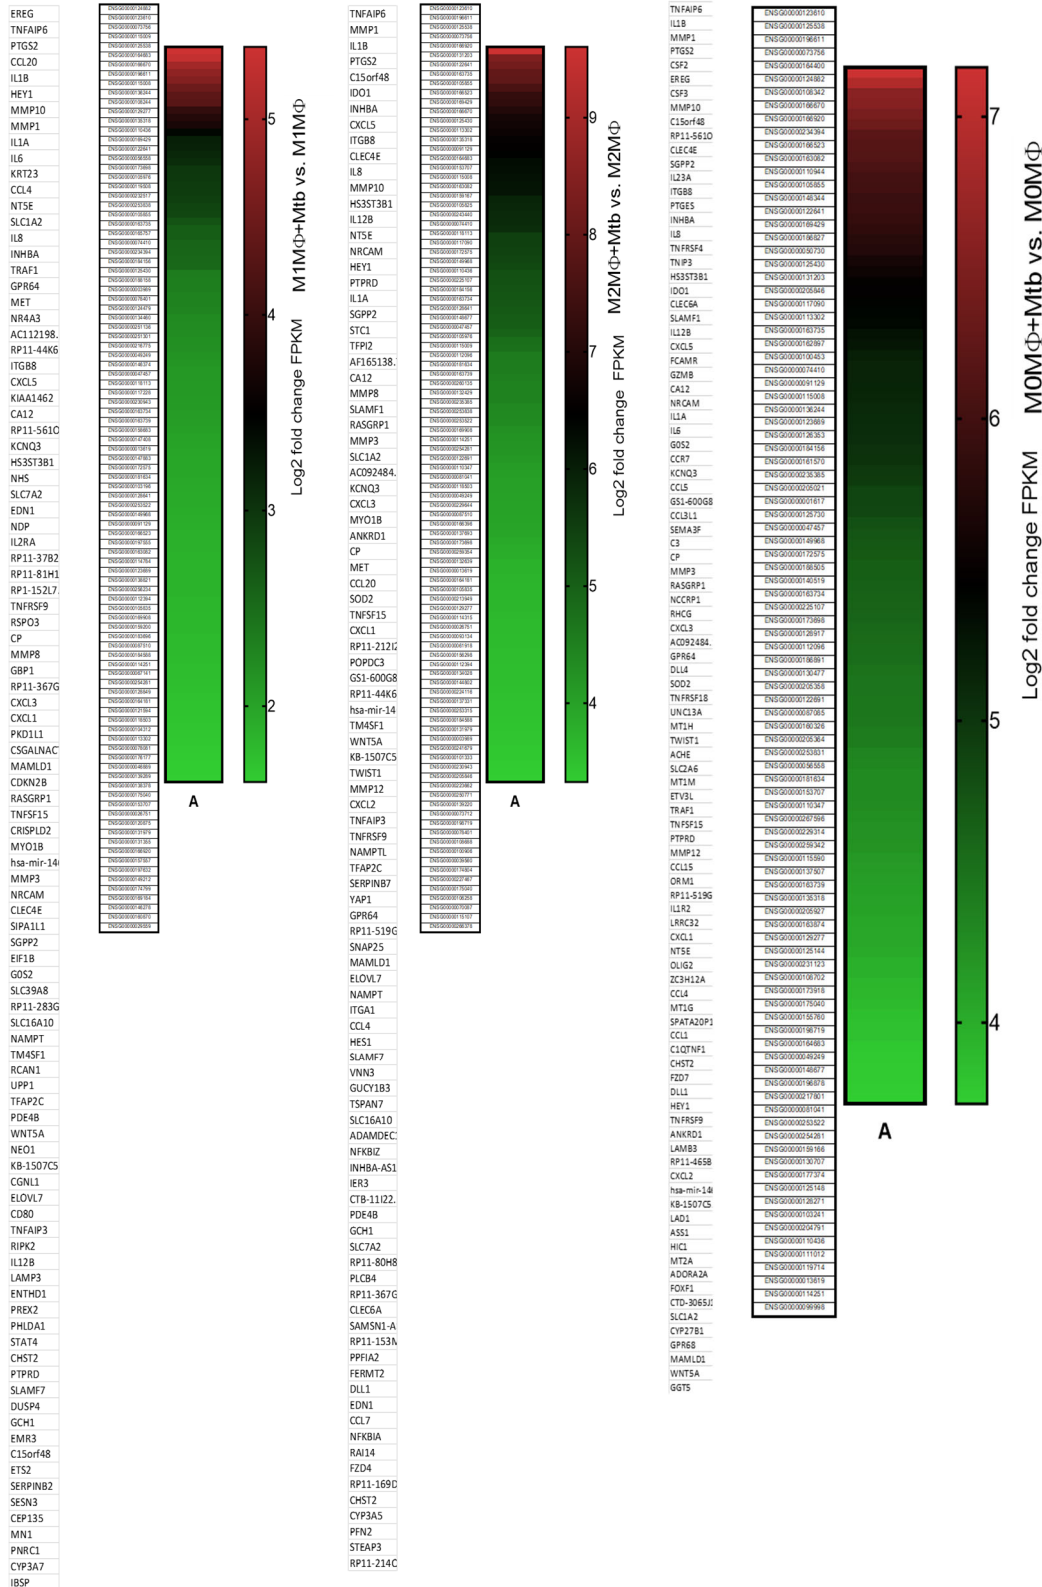

**Supplemental Figure-5: Down-regulation of expression in Mtb infected M1-, M2- and M0-MΦs.** Fig. 2 main text shows up-regulation of gene expression. Gene clusters which are ‘down regulated’ are shown for the same groups. (\*  $p < 0.0001$ , *Clusterprofile* workflow. Novogene Inc, USA).

**Mtb infected M1-MΦs vs. Mtb-M2-MΦs**  
Down regulated KEGG

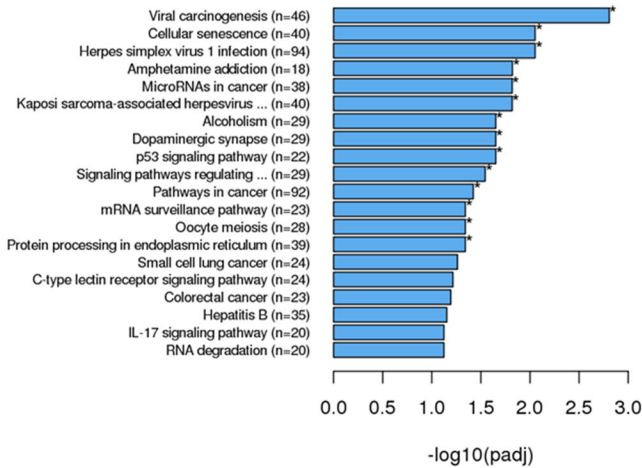

**Mtb infected M1-MΦs vs. Mtb-M0-MΦs**  
Down regulated KEGG

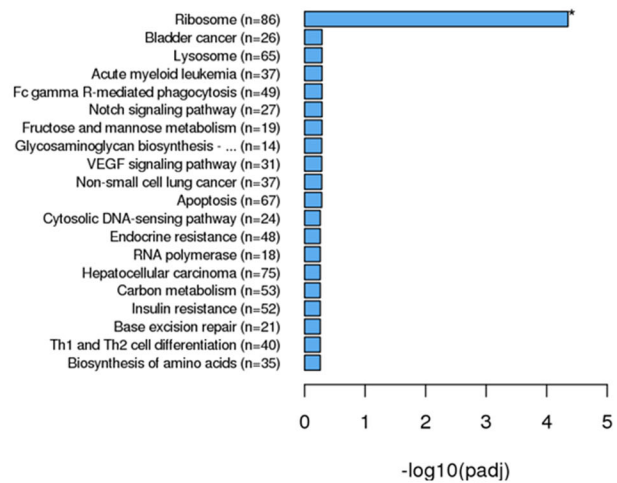

**Mtb infected M2-MΦs vs. Mtb-M0-MΦs**  
Up regulated KEGG

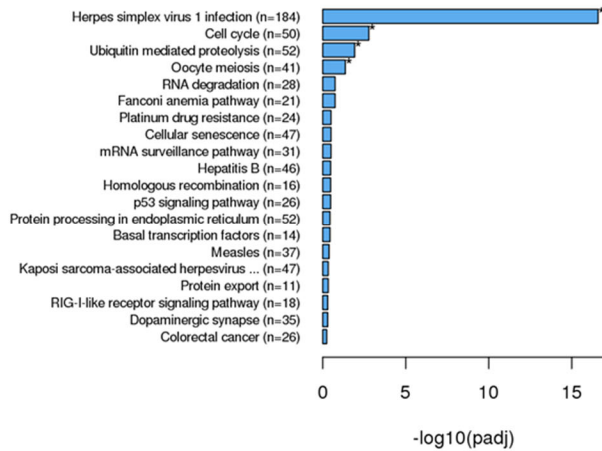

**Mtb infected M2-MΦs vs. Mtb M0-MΦs**  
Down regulated KEGG

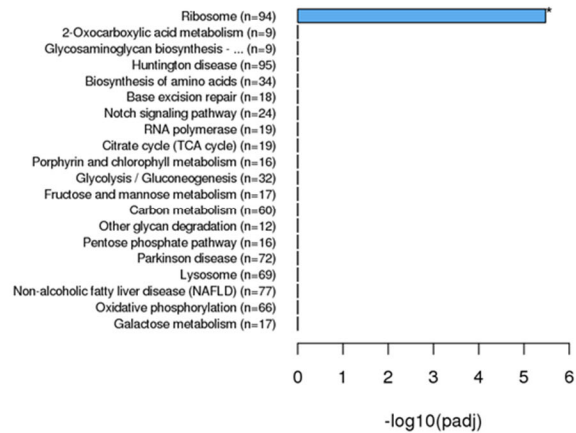

**Supplemental Figure-6: Clusterprofile pathway analysis of gene expression in Mtb infected M1 and M2-MΦs. NOD- receptor mediated signaling is illustrated. Caspase gene expression up regulated (red) in Mtb infected M1-MΦs (highlighted box) when enhance IL-1β secretion (SF.1).**

Mtb infected  
M1-MΦs vs.  
Mtb+M2-MΦs

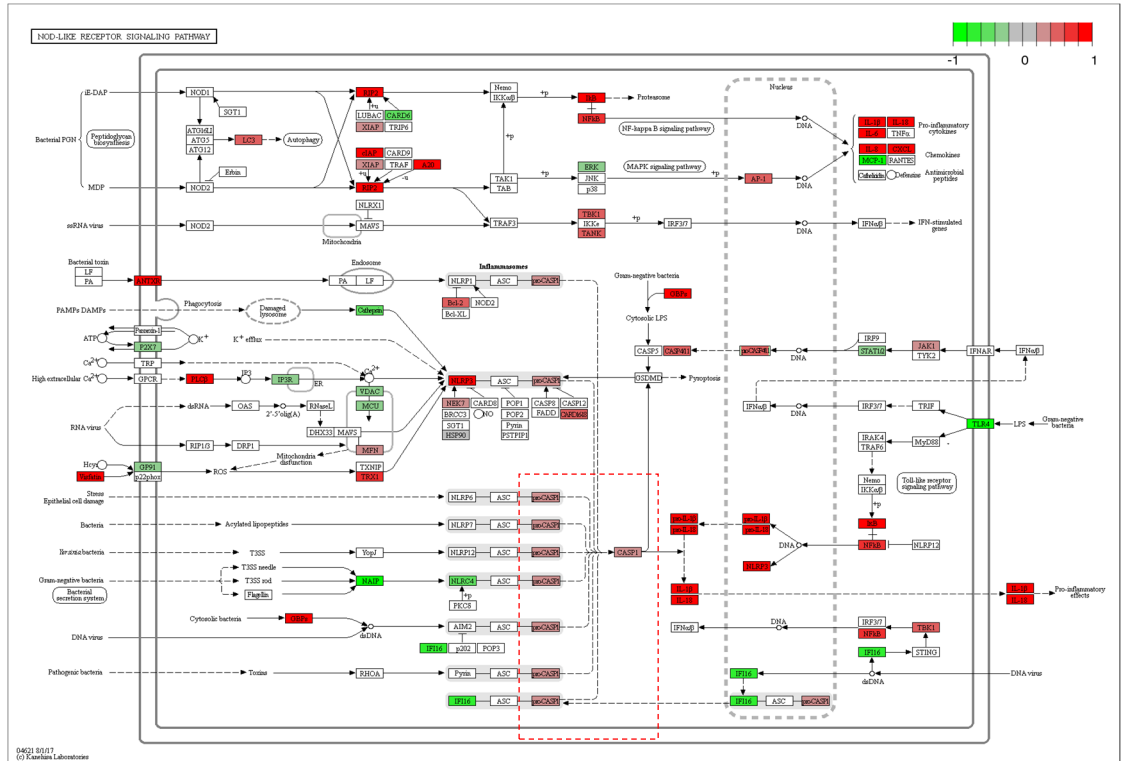

Mtb infected  
M2-MΦs vs.  
Mtb+M0-  
MΦs

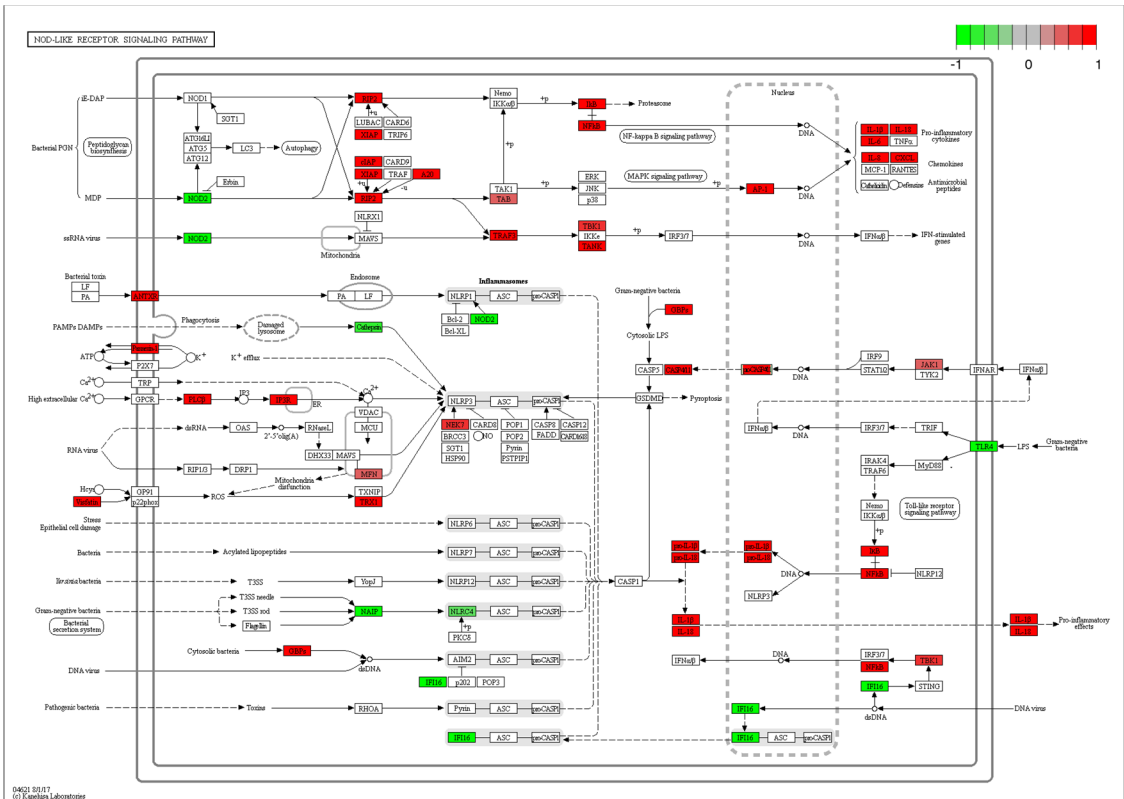



**Supplemental Figure-8:** 'Simple' western blot analysis of ATG expression in Mtb infected M1, M2 and M0-MΦs (see SF-14 for 'Simple' capillary gel electrophoresis procedure)

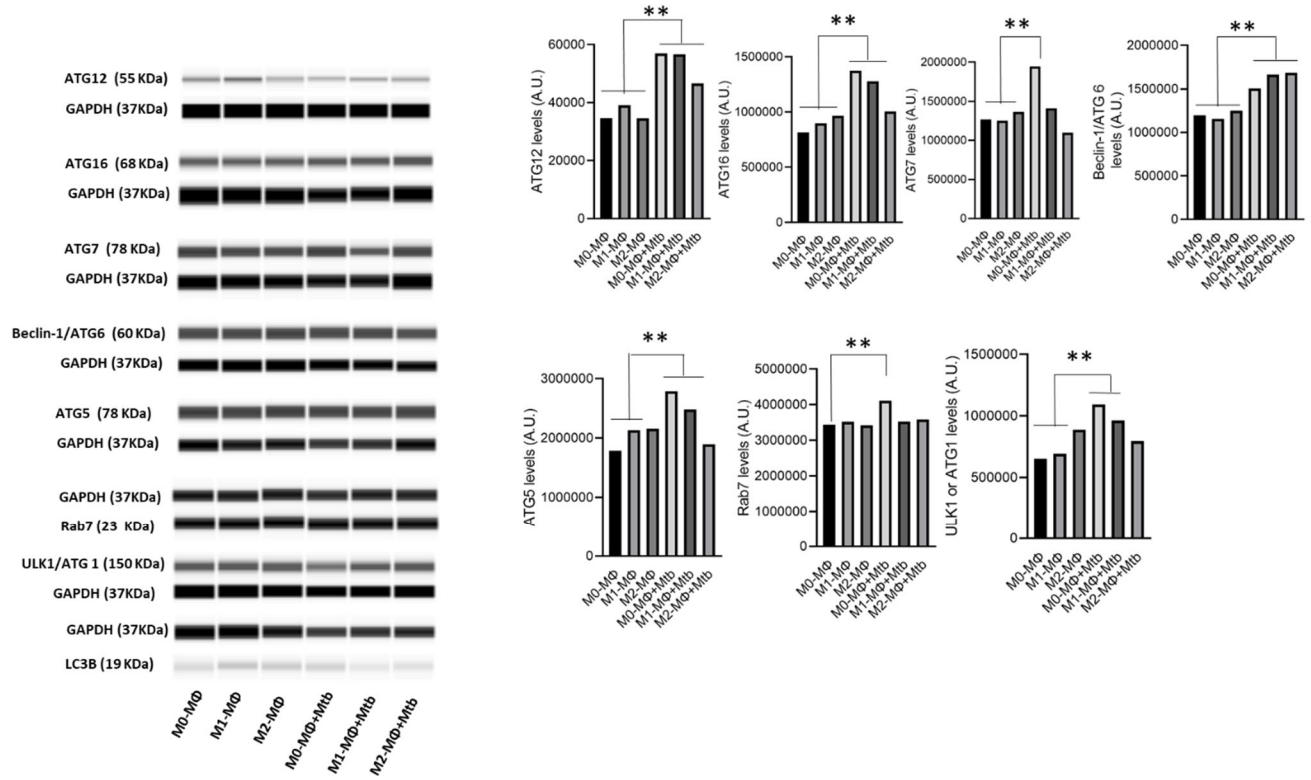



**Supplemental Figure-9:** Clusterprofile pathway analysis of antigen processing gene expression in Mtb infected M1, M2 and M0-MΦs

Mtb infected M1-MΦs vs. Mtb+M2-MΦs

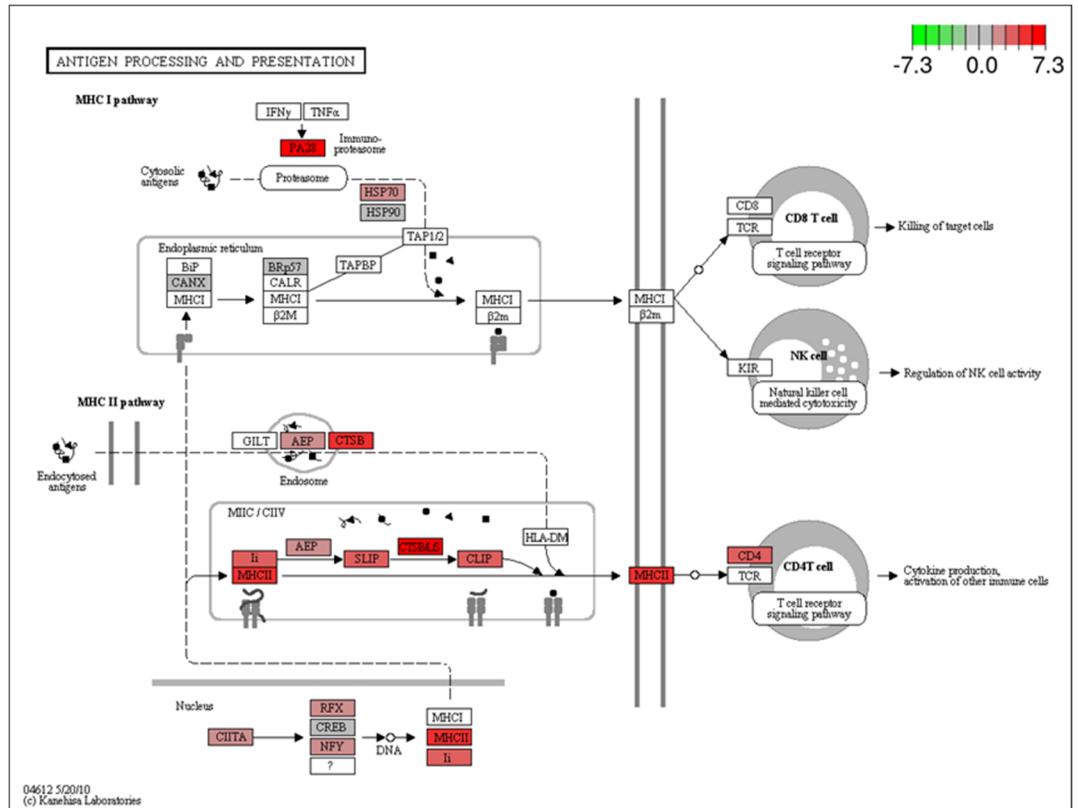

Mtb infected M2-MΦs vs. Mtb+M0-MΦs

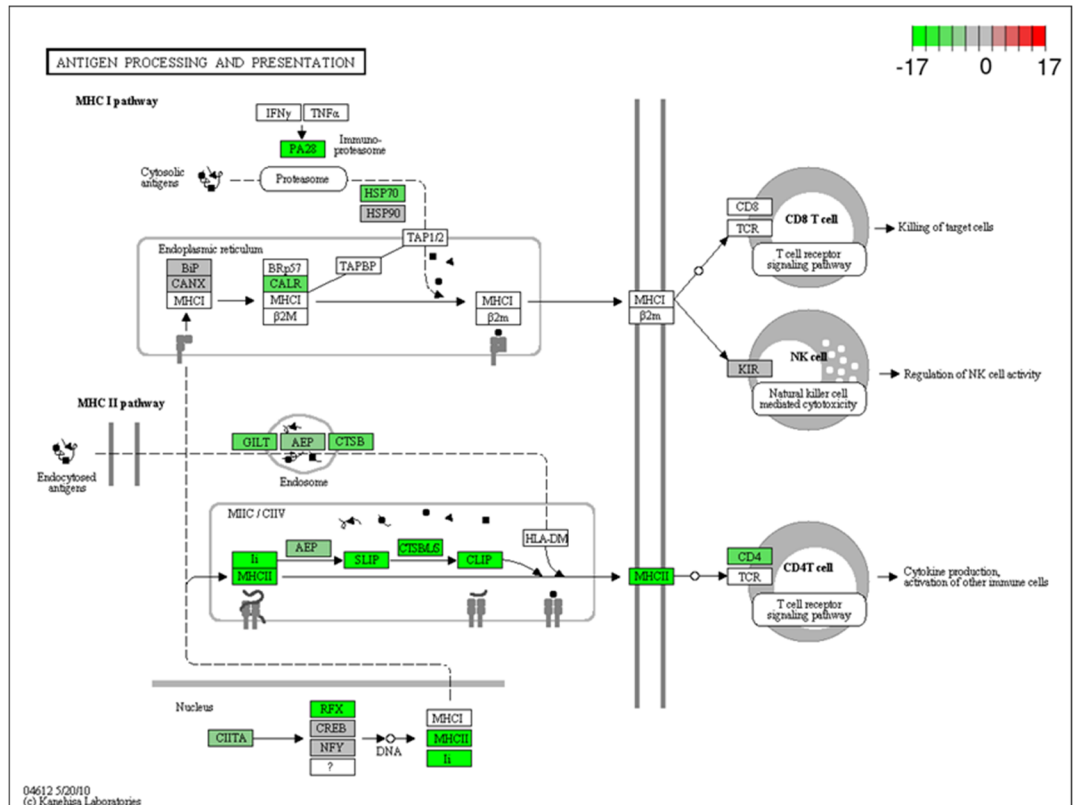



**Supplemental Figure -11:** Biomarker genes and TFs which are differentially expressed during the transcriptomics of human blood from TB patients and LTBI (8 studies compared; Singhania et al, 2018, *Nature Imm*, 19,1159). Distribution of these genes shown in M1, M2 and M0-MΦs before and after infection with Mtb from this study. Values are Mean FPKM (n=2) (+ indicate expression in MΦs; - indicates no expression in MΦs).

| Genes /Gene cluster<br>Observed in > 2 studies                              | Mean FPKM in Mtb/naive infected M1-MΦs | Mean FPKM in Mtb infected/naive M2-MΦs | Mean FPKM in Mtb infected/naive M0-MΦs |
|-----------------------------------------------------------------------------|----------------------------------------|----------------------------------------|----------------------------------------|
| DUSP3                                                                       | 1678.818 /2202.335                     | 953.3249 /2049.629                     | 3621.01 /6002.957                      |
| FC $\gamma$ -gamma receptor cluster:<br>FCGR1A,<br>FCGR1B,<br>FCGR1C        | Figure 6                               | Figure 6                               | Figure 6                               |
| SEPTIN cluster: SEPT4                                                       | Not detected                           | Not detected                           | 67.14166 /74.24991                     |
| SEPT2 (this study only)                                                     | 5345.322 /7134.336                     | 5300.023 /9916.673                     | 3276.358 /5748.287                     |
| SEPT11 (this study only)                                                    | 6430.194 /5451.145                     | 5257.346 /4038.622                     | 3080.334 /2493.353                     |
| GBP cluster:GBP4<br>GBP5 GBP1<br>GBP 2 GBP6<br>GBP3, GBP5 (this study only) | Figure 6                               | Figure 6                               | Figure 6                               |
| ANKRD2                                                                      | 411.4292 /442.3031                     | 254.5118 /288.9497                     | 164.0981 /116.6086                     |
| BATF2                                                                       | 0.534486 /0                            | 0 /1.842238                            | 94.27638 /149.0838                     |
| GAS6                                                                        | 32.1491 /30.35582                      | 10.602 /1.348186                       | 433.1825 /1655.422                     |
| SERPING1                                                                    | 56.3941 /62.53262                      | 0 /0.921119                            | 784.9096 /741.3397                     |
| LHFPL2                                                                      | 11136.43 /13807.33                     | 4210.608 /3550.984                     | 4736.907 /3404.546                     |
| S100A8                                                                      | 3880.484 /7612.845                     | 20.36729 /142.8964                     | 10158.9 /5858.476                      |
| <b>Genes /Gene cluster Observed in one of 8 studies</b>                     |                                        |                                        |                                        |
| SCARF1                                                                      | 21.70551 10.90318                      | 30.49339 5.909124                      | 4735.546 1226.791                      |
| AAK1                                                                        | +                                      | +                                      | +                                      |
| ALDH1A1                                                                     | -                                      | -                                      | -                                      |
| APOL1 ;<br>APOL4                                                            | +                                      | +                                      | +++                                    |
| ARG1                                                                        | +                                      | +                                      | +                                      |
| ARHGEF9                                                                     | -                                      | -                                      | -                                      |
| ARNTL                                                                       | -                                      | -                                      | -                                      |
| BACH2                                                                       | -                                      | -                                      | -                                      |
| BDH1                                                                        | +                                      | +                                      | +                                      |
| BLK 1                                                                       | -                                      | -                                      | -                                      |
| BTN3A1                                                                      | -                                      | -                                      | -                                      |
| C19ORF;<br>C19ORF;<br>C1QB                                                  | +                                      | +                                      | +                                      |

|                      |    |    |     |
|----------------------|----|----|-----|
| C4ORF18; C5;<br>C1QC |    |    |     |
| CALML4               | -  | -  | -   |
| CASC1                | -  | -  | -   |
| CCDC120              | +  | +  | +   |
| CCR6                 | +  | +  | +   |
| CD177                | -  | -  | -   |
| CD1C                 | +  | +  | +   |
| CD274                | ++ | ++ | ++  |
| CD74                 | +  | -  | +++ |
| CD79A ;<br>CD79B     | -  | -  | -   |
| CD96                 | +  | +  | +   |
| CERKL                | +  | +  | +   |
| CLC                  | +  | +  | +   |
| CNIH4                | +  | +  | +   |
| COL4A4               | -  | -  | -   |
| MARCD3               | -  | -  | -   |
| TMCC1                | +  | +  | +   |
| SMARCD3              | +  | +  | ++  |
| SMYD5                | +  | -  | +   |
| SPHK1                | -  | -  | +   |
| STAT1                | ++ | ++ | +   |
| TAP1                 | +  | -  | ++  |
| TMEM25               | -  | -  | -   |
| TRAF4                | -  | -  | +   |
| TRAFD1               | +  | -  | +   |
| TRIM47               | -  | -  | +   |
| UGP2                 | ++ | ++ | ++  |
| USP54                | +  | +  | +   |
| VAMP5                | -  | -  | +   |
| VEGFB 1              | -  | -  | -   |
| VPREB3               | -  | -  | -   |
| ZNF296               | ++ | ++ | ++  |

**Supplemental Figure-12:** Clusterprofiler analysis of a lymph node transcriptome from Mb infected neonatal macaques (One of three NHP LNs analyzed shown; similar profiles for 2 others not shown). Red indicates up-regulated; green down-regulated.

Axillary LN

Phagosome

Lysosome

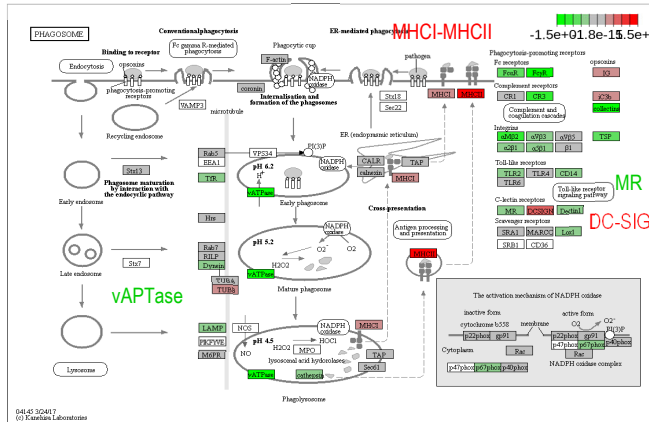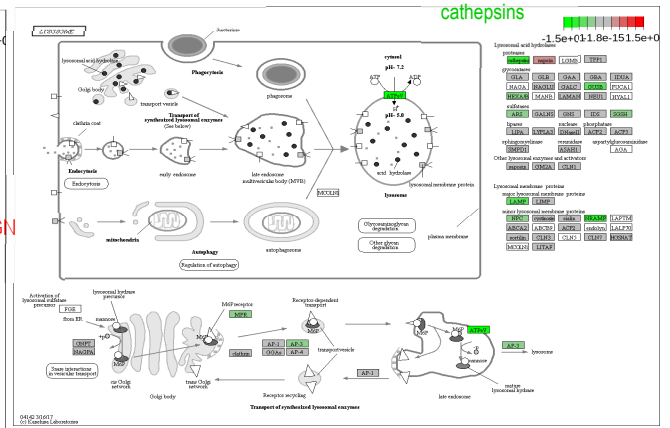

Hilar LN

Phagosome

Lysosome

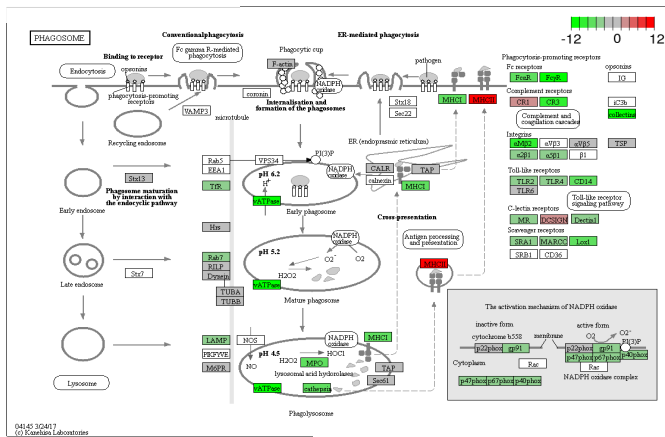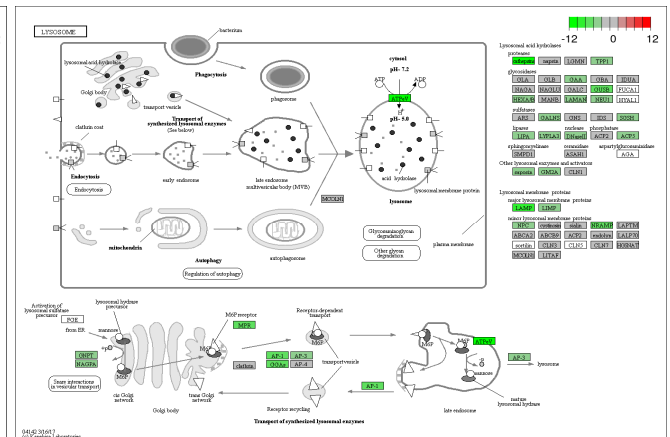

Inguinal LN

Phagosome

Lysosome

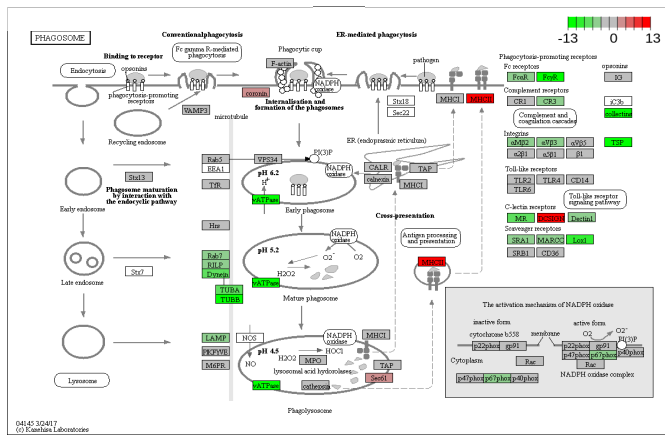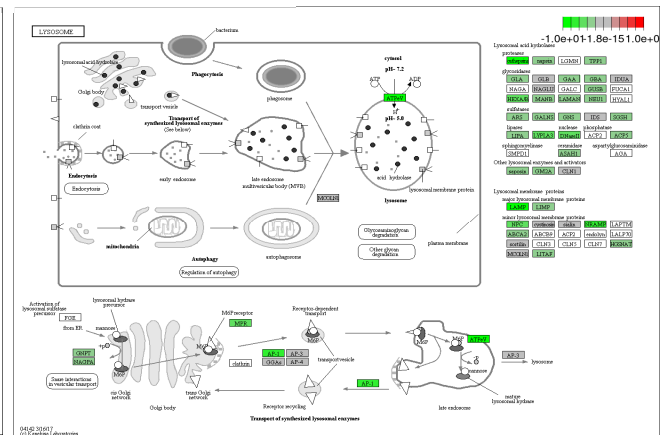

**Supplemental Figure-13:**

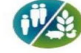

**THIS SECTION IS BEING PROVIDED FOR REVIEW PURPOSES ONLY: RNA-sequencing of Mtb infected Macrophages;** these were conducted two times following the strategy.

readings the p values ( < 01 Library Preparation and Sequencing

From the RNA sample to the final data, each step, including sample test, library preparation, and sequencing, influences the quality of the data, and data quality directly impacts the analysis results. To guarantee the reliability of the data, quality control (QC) is performed at each step of the procedure. The workflow is as follows:

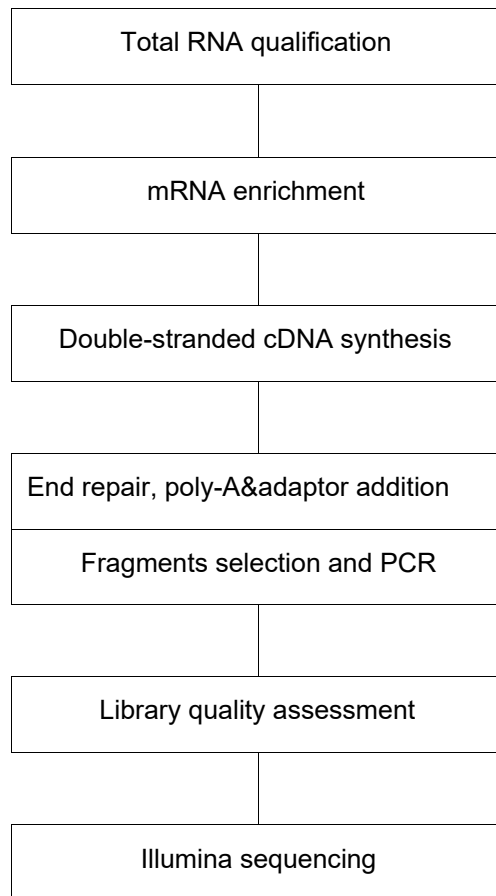

1.1 Total RNA Sample QC

All samples need to pass through the following three steps before library construction:

- (1) Nanodrop: preliminary quantitation
- (2) Agarose Gel Electrophoresis: tests RNA degradation and potential contamination
- (3) Agilent 2100: checks RNA integrity and quantitation



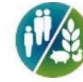

## 1.2 Library Construction and Quality Assessment

After the QC procedures, mRNA from eukaryotic organisms is enriched from total

1

RNA using oligo(dT) beads. For prokaryotic samples, rRNA is removed using a specialized kit that leaves the mRNA. The mRNA from either eukaryotic or prokaryotic sources then fragmented randomly in fragmentation buffer, followed by cDNA synthesis using random hexamers and reverse transcriptase. After first-strand synthesis, a custom second-strand synthesis buffer (Illumina) is added, with dNTPs, RNase H and Escherichia coli polymerase I to generate the second strand by nick-translation and AMPure XP beads is used to purify the cDNA. The final cDNA library is ready after a round of purification, terminal repair, A-tailing, ligation of sequencing adapters, size selection and PCR enrichment. Library concentration was first quantified using a Qubit 2.0 fluorometer (Life Technologies), and then diluted to 1 ng/μl before checking insert size on an Agilent 2100 and quantifying to greater accuracy by quantitative PCR (Q-PCR) (library activity >2 nM). The workflow chart is as follows:

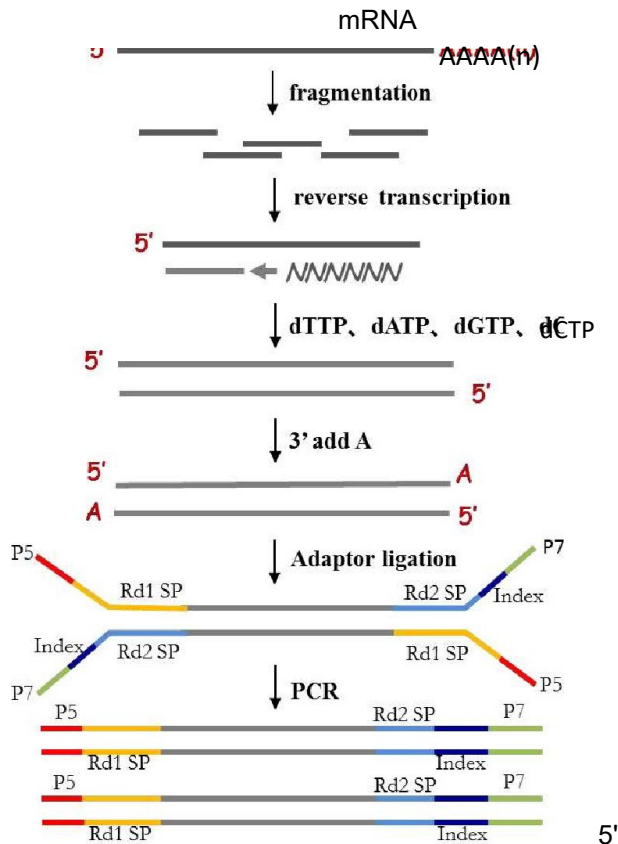

## 1.3 Sequencing

Libraries are fed into Novaseq6000 machines according to activity and expected data volume. A paired-end 150 bp sequencing strategy was used and all samples were sequenced to at least 6 Gb.

**Supplemental Table 1****SiRNAs (Duplexes Custom synthesized by Origene)**

| <b>Target</b> | <b>Source</b> | <b>Catalog No.</b> | <b>Dilution</b> |
|---------------|---------------|--------------------|-----------------|
| Atg5          | OriGene       | SR322789           | 1/1000          |
| Beclin 1/Atg6 | OriGene       | SR322490           | 1/1000          |
| Atg7          | OriGene       | SR323157           | 1/1000          |
| Atg12         | OriGene       | SR306046           | 1/1000          |
| Atg16L1       | OriGene       | SR324356           | 1/1000          |
| ULK1/Atg1     | OriGene       | SR322391           | 1/1000          |
| IFITM3        | OriGene       | SR323108           | 1/1000          |
| SLAMF8        | OriGene       | SR324597           | 1/1000          |
| GABRAP        | OriGene       | SR307771           | 1/1000          |
| AMBRA1        | OriGene       | SR310808           | 1/1000          |
| Rab7          | GE Dharmacon  | NC1660768          | 1/1000          |

**Antibodies used for Flow Cytometry**

| <b>Target</b>                 | <b>Source</b>      | <b>Catalog No.</b> | <b>Dilution</b> |
|-------------------------------|--------------------|--------------------|-----------------|
| PE-Cy7 anti-human CD68        | BD Biosciences     | 565595             | 1/1000          |
| PE anti-human CD14            | Invitrogen         | 12-0149-42         | 1/1000          |
| APC anti-human CD206          | Biolegend          | 321110             | 1/1000          |
| AF700 anti-human CD80         | BD Biosciences     | 561133             | 1/1000          |
| Aqua fluorescent reactive dye | Invitrogen, cat no | L34957             | 1/1000          |

**Antibodies used for Western blot**

| <b>Target</b>                      | <b>Source</b>     | <b>Catalog No.</b> | <b>Dilution</b> |
|------------------------------------|-------------------|--------------------|-----------------|
| IFITM3                             | Cell Signaling    | 59212S             | 1/50            |
| ATG12                              | Cell Signaling    | 2010P              | 1/50            |
| ATg16L                             | Cell Signaling    | 8089s              | 1/50            |
| ATG7                               | Cell Signaling    | 8558s              | 1/50            |
| Beclin-1                           | Cell Signaling    | 3738s              | 1/50            |
| ATG5                               | Cell Signaling    | 12994s             | 1/50            |
| Rab7                               | Cell Signaling    | 9367T              | 1/50            |
| ULK1                               | Cell Signaling    | 8054s              | 1/50            |
| LC3B                               | Cell Signaling    | 2775s              | 1/300           |
| Gbp1                               | Novus Biologicals | NBP-1-31560        | 1/50            |
| Sirtuin Antibody Sampler Kit       | Cell Signaling    | 9787T              | 1/50            |
| Class I HDAC Antibody Sampler Kit  | Cell Signaling    | 65816T             | 1/50            |
| Class II HDAC Antibody Sampler Kit | Cell Signaling    | 79891T             | 1/50            |
| SQSTM1 Polyclonal Antibody         | abclonal          | A19700             | 1/50            |
| Rab8                               | Cell Signaling    | 6975T              | 1/50            |
| NDP52                              | Cell Signaling    | 60732S             | 1/50            |
| GAPDH                              | Sigma             | SAB5600208         | 1/50            |

|                                                                             |                  |         |      |
|-----------------------------------------------------------------------------|------------------|---------|------|
| GBP5                                                                        | Cell Signaling   | 67798S  | 1/50 |
| FCgRA                                                                       | abclonal         | A2552   |      |
| Standardized for MILO protein analysis in single cells (Fig. 3 main text)   |                  |         |      |
| ATG7:                                                                       | R&D              | MAB6608 | 1/10 |
| ATG5:                                                                       | Cell signaling   | 12994s  | 1/10 |
| GAPDH:                                                                      | Cell Signaling   | 5174S   | 1/10 |
| N-Acetyl-L-leucyl-L-leucyl-L-methional (NLALLM); Cathepsin pan in inhibitor | Tocris biotechne | 0384/10 |      |
| Balicatib; Cathepsin K inhibitor                                            | Tocris biotechne | 5585/10 |      |
| E 64; Cysteine protease inhibitor                                           | Tocris biotechne | 5208/10 |      |
| Calpeptin; Cathepsin-L (CTSL) inhibitor                                     | Tocris biotechne | 0448/10 |      |
| Sirtinol: sirtuin inhibitor                                                 | Tocris biotechne | 3521/10 |      |
| Tubastatin A hydrochloride HDAC inhibitor                                   | Tocris biotechne | 6270/10 |      |

**Supplemental Table 2. Sequences of ATG Primers for Q-RT-PCR**

| <b>Primer Set</b> | <i>Sequence (5' - 3')</i> |                         |
|-------------------|---------------------------|-------------------------|
|                   | <b>Forward</b>            | <b>Reverse</b>          |
| ATG1              | ATGGGTCTAGGCGACCATCT      | GCTGCTGTTGATTTGCACCA    |
| ATG3              | TCCCATGTGTTTCAGTTCACCC    | TGCCACTAATCTTACATACAGGG |
| ATG4A             | TGCTGGTTGGGGATGTATGC      | GCGTTGGTATTCTTTGGGTTGT  |
| ATG4B             | ATGGACGCAGCTACTCTGAC      | TTTTCTACCCAGTATCCAAACGG |
| ATG5              | AAAGATGTGCTTCGAGATGTGT    | CACTTTGTCAGTTACCAACGTC  |
| ATG6 (Beclin1)    | GGTGTCTCTCGCAGATTCATC     | TCAGTCTTCGGCTGAGGTTCT   |
| ATG7              | CAGTTTGCCCCTTTTAGTAGTGC   | CCAGCCGATACTCGTTCAGC    |
| ATG8E (LC3)       | AACATGAGCGAGTTGGTCAAG     | CGTGTTGCTCTACTGCC       |
| ATG12             | CTGCTGGCGACACCAAGAAA      | GATGATGAATGCGAGTCAGATGC |
| ATG13             | TTGCTATAACTAGGGTGACACCA   | CCCAACACGAACTGTCTGGA    |
| ATG14             | GCGCCAAATGCGTTCAGAG       | AGTCGGCTTAACCTTTCCTTCT  |
| ATG16L1           | AACGCTGTGCAGTTCAGTCC      | AGCTGCTAAGAGGTAAGATCCA  |
| SQSTM1 (p62)      | GCACCCCAATGTGATCTGC       | CGCTACACAAGTCGTAGTCTGG  |
| hPPIA             | CCCACCGTGTCTTCGACATT      | GGACCCGTATGCTTTAGGATGA  |

**qPCR assay for gene expression in human and macaque macrophages**

Total RNA was extracted using RNAeasy mini kit (Qiagen, Germany) from human and NHP PBMCs or M1/M2 polarized macrophages. RNA concentration and purity ratios (OD260/280, OD260/230) were measured using the NanoDrop ND-1000 spectrophotometer (Thermo Fisher

Scientific, USA). cDNA synthesis was performed on a CFX96 Real-Time PCR System (Biorad, USA) using the 2X OneStep qRT-PCR Mastermix Kit (Applied Biosystems, USA) according to manufacturer's instruction. Quantitative PCR (qPCR) was performed using SYBR green probe and gene specific primers (Table 1 for Human and Table2 for NHP). Threshold cycle numbers were transformed to  $\Delta\Delta C_t$  values, and the results were expressed relative to the reference gene,  $\beta$ -actin and GAPDH. Gene expression data was performed using GraphPad Prism ver. 6.0 suite (GraphPad Software). Student's t-test was used for means comparison between both uninfected and Mtb infected M1- and M2-polarised cells. Significance was set at the 0.05 level.

**Supplemental Table 3. qPCR primers for Human**

| GENE             | Forward primer 5'->3'   | Reverse primer 5'->3'    |
|------------------|-------------------------|--------------------------|
| <b>GBP 1</b>     | GTGGAACGTGTGAAAGCTGA    | CAACTGGACCCTGTCGTTCT     |
| <b>GBP 2</b>     | GATTTCCACCCTGGAAGTGA    | GGGTTCCAGCTCTTCCTCCTT    |
| <b>GBP 3</b>     | TTAATCTGCCCCGACTCTGT    | CATTGACCTTGATGCCTCCT     |
| <b>GBP 5</b>     | CAGGAACAACAGATGCAGGA    | TCATCGTTATTAACAGTCCTCTGG |
| <b>GBP 6</b>     | TCCTGTGCAGCACCTTTGTC    | AGCTCCGTACATAATGCAGC     |
| <b>Siglec 14</b> | GCACCTGTCCTTCATCCTTTC   | AGGAGCCCTGCTGTTTCTCA     |
| <b>Siglec 15</b> | CGCGGATCGTCAACATCTC     | GTTCCGGCGGTCAGTAGGTG     |
| <b>SlamF1</b>    | AGGCCCTCCACGTTATCTA     | GCAAAAGCGCTGAACTGA       |
| <b>SlamF7</b>    | TCTCTTTGTAAGTGGGCTATTTT | TTTTCCATCTTTTTCGGTATTT   |
| <b>SlamF9</b>    | TGGTGTGCTCTGTGGAGAAG    | TTTTCTGGACTCGGATGACC     |
| <b>iNOS</b>      | CAGCGGGATGACTTTCCAAG    | AGGCAAGATTTGGACCTGCA     |

**Supplemental Table 4. qPCR primers for NHP**

| Gene               | Forward primer 5'->3'           | Reverse primer 5'->3'              |
|--------------------|---------------------------------|------------------------------------|
| <b>Siglec14</b>    | GCACCTGTCCTTCATCCTTTC           | AGGAGCCCTGCTGTTTCTCA               |
| <b>GBP 2</b>       | TCAATCATATGCGACTCCATTTTG        | AGGGAAACCTGGGATGAGATTTAG           |
| <b>SIRT2</b>       | CAGAACATAGATACCCTGGAGCGA<br>A   | AAGGTCCTCCAGCTCCTTCTTC             |
| <b>SIRT5</b>       | CGAGTCGTGGTCATCACCCAGAAC<br>ATC | ACTCTTGTAATTCTCAGCCACAACCTCC<br>AC |
| <b>SLAMF1</b>      | AGGCCCTCCACGTTATCTA             | GCAAAAGCGCTGAACTGA                 |
| <b>HDAC1</b>       | GTCCAGATAACATGTCCGGAGTACA<br>GC | CGATGTCCGTCTGCTGCTTATTAAG          |
| <b>HDAC2</b>       | CCTCATAGAATCCGCATGACCCATA<br>AC | AGACATGTTATCTGGTCTTATTGACCG<br>TAG |
| <b>cathepsin B</b> | TTCTTGCGACTCTTGGGACTTC          | TGACGAGGATGACAGGGAACTA             |
| <b>cathepsin D</b> | CCCACACACACCCACACACTCG          | CCAGGGAGGGGAAAACCCACAGA            |
| <b>cathepsin L</b> | AGGGTCAGTGTGGTTCTTGTTG          | TGAGATAAGCCTCCAGTTTTC              |

Fold change is calculated by using  $2^{-\Delta\Delta C_t}$  method; Briefly:

$$\Delta Ct = Ct (\text{gene of interest}) - Ct (\text{housekeeping gene})$$

$$\Delta\Delta Ct = \Delta Ct (\text{treated sample}) - \Delta Ct (\text{untreated sample})$$

$$\text{Fold change} = 2^{-\Delta\Delta Ct}$$

**Supplemental Figure-14: ‘Protein Simple’ Western Assay / Wes analysis of proteins in lysates of Mtb infected vs naïve macrophages.** For the analysis of protein levels of macrophages, we used the quantitative Wes capillary immunoassay, in which proteins were separated and detected using Wes separation capillary cartridge 12-230 kDa along with Wes Anti-Rabbit Detection Module (Simple Western system and Compass Software, Protein Simple). In brief, glass microcapillaries were loaded with stacking and separation matrices followed by sample loading. During capillary electrophoresis, proteins were separated by size and then immobilized to the capillary wall. Samples were loaded at 1 mg/ml dilution and the primary rabbit antibodies and GAPDH were used at 1:50 dilution. Data were analyzed with the Compass software (version 2.6.7). The area under the curve (AUC), which represents the signal intensity of the chemiluminescent reaction was analyzed for all the antibodies and GAPDH. Values given for protein expression were normalized to GAPDH. Quantitation of protein levels (area under each peak; arbitrary units [A.U.]) were performed using the Compass software (version 2.6.7). All the primary antibodies used for the Simple Western were as follows: IFITM3 (cat. no.59212S), ATG12 (cat. no. 2010P), ATg16L (cat. no. 8089s), ATG7 (cat. no. 8558s), Beclin-1 (cat. no. 3738s), ATG5 (cat. no. 12994s), Rab7 (cat. no. 9367T), ULK1 (cat. no. 8054s), LC3B (cat. no. 2775s), GAPDH (cat. no. 5174s) and Gbp1 (cat. no. NBP-1-31560). All the antibodies were purchased from cell signaling except for Gbp1 which was purchased from Novus biologicals. *Nature communications* <https://doi.org/10.1038/s41467-018-08247-x>. <https://doi.org/10.1038/s41467-018-08247-x>

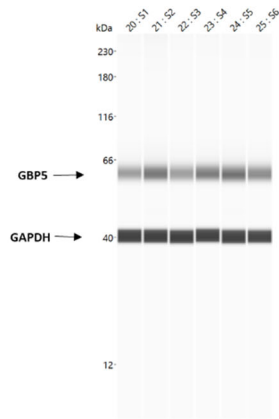

A. Original Automated Wes Western blot showing GBP5 levels on the top and GAPDH on the bottom

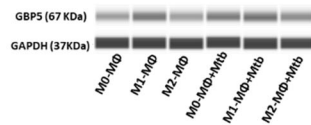

B. Automated Wes Western blot showing GBP5 and GAPDH levels edited from (A)

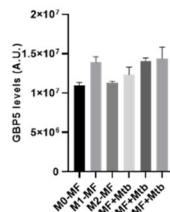

C. Quantitation of GBP5 levels (area under each peak; arbitrary units [A.U.])

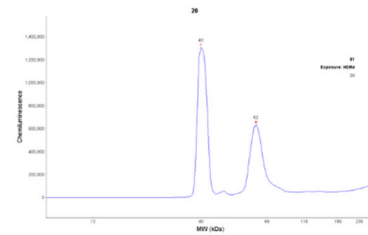

D. Electropherogram showing the expression level of GBP5 and GAPDH (Sample M0-MD)

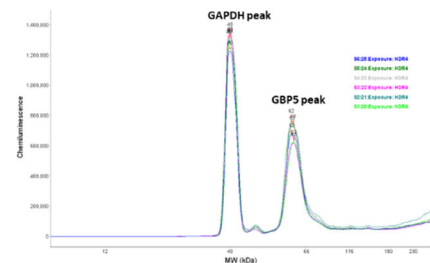

E. Overlay (sample 1-6) of electropherograms displayed in (D)

Supplemental Figure-15: Densitometry of blots:

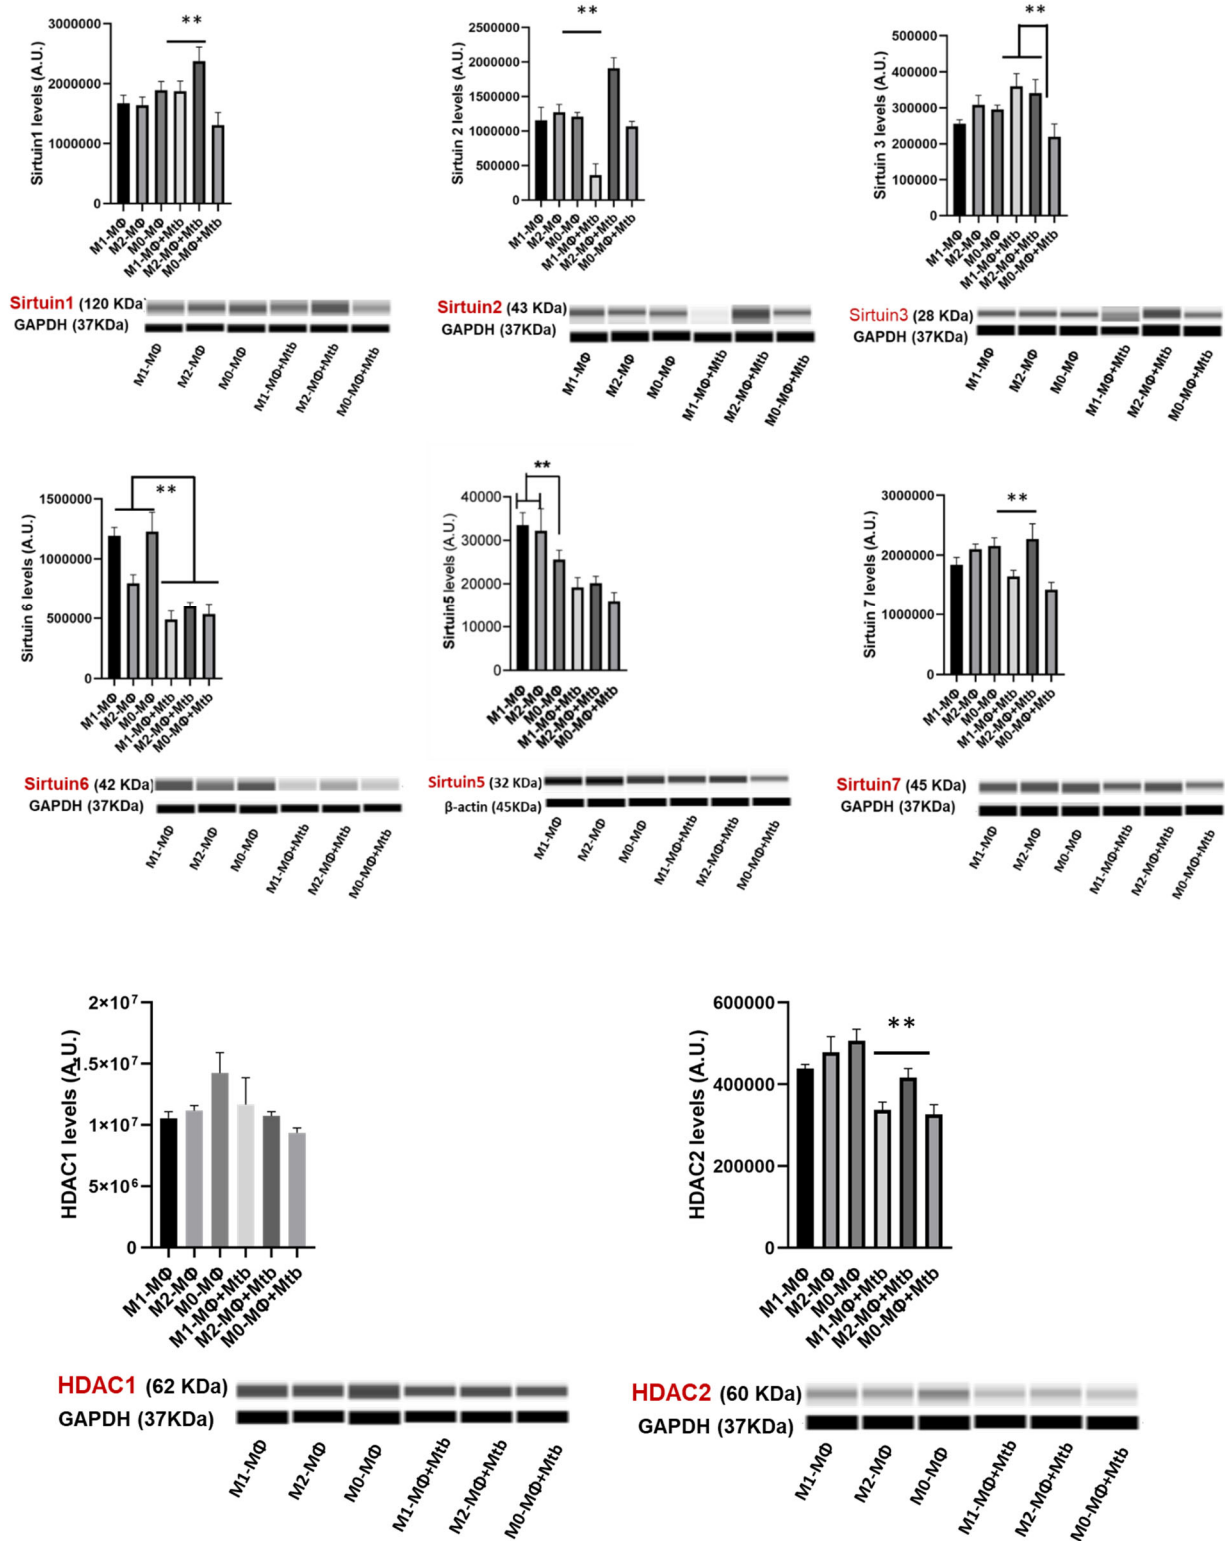



Densitometry of blots Fig. 6: Western (Wes) Blot analysis of Proteins associated with Antigen Processing. Densitometry readings with the p values (< 0.01) for comparisons within groups (naïve vs. Mtb infected). Proteins for which reliable antibodies were available are shown. Fujiwara et al show GBP5 is enriched in M1-MΦs which is reproduced here although after Mtb infection, GBP5 levels are uniformly increased (see also Fig. 4 main text). SQSTM1 is an autophagy substrate which gets depleted during autophagic flux. FcRs are ideally detected using flow cytometry on the surface of macrophages although protein levels of cell lysates may differ.

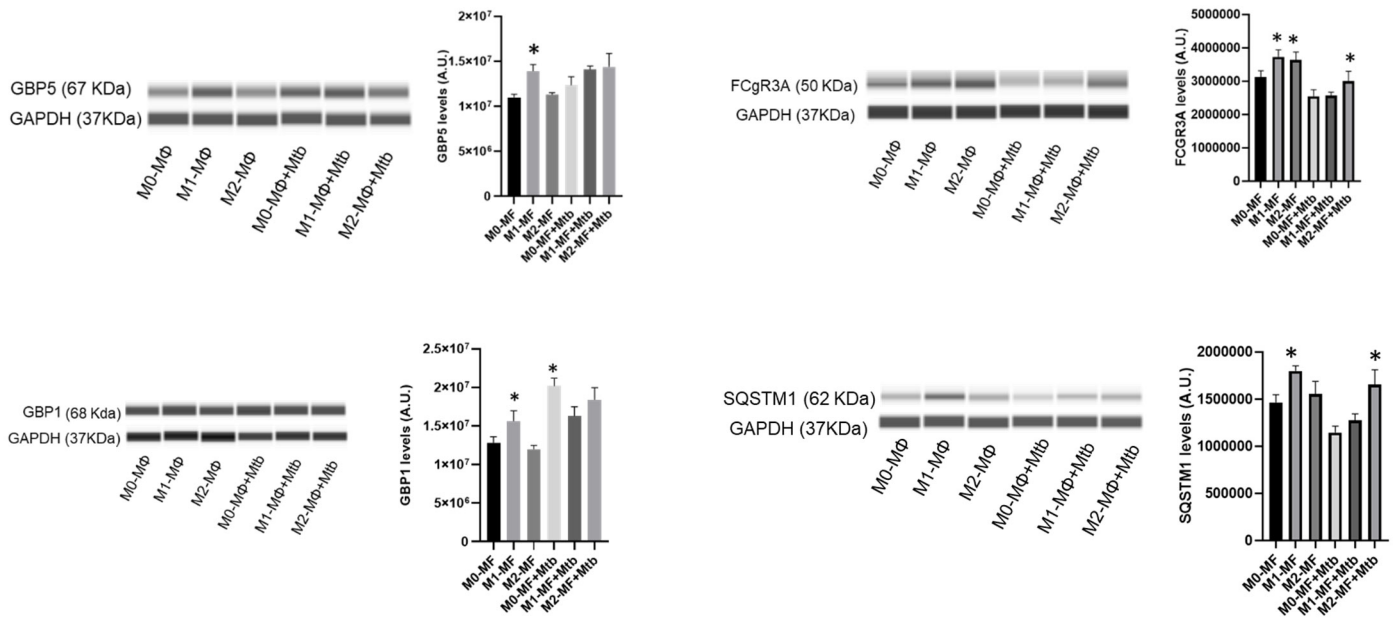

Supplement: 42003_2022_3387_MOESM1_ESM.pdf [file 42003_2022_3387_MOESM1_ESM.pdf]
